# Supplementary material
Source: PubMed Central journal article supplement (PMC4713385)
Supplement: NIHMS710055-supplement-Supp_Fig.pdf [file NIHMS710055-supplement-Supp_Fig.pdf]

Supplementary Figure 1. Chemical Structure 5-azacytidine and the internal standard 5-methyl-2'-deoxycytidine

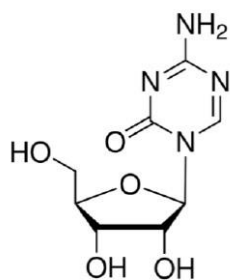

**5-azacytidine (5AC)**

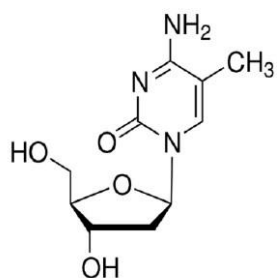

**5-methyl-2'-deoxycytidine (5-Me-2'DC)**
