# Supplementary material
Source: PubMed Central journal article supplement (PMC4713385)
Supplement: NIHMS710055-supplement-Tables.pdf [file NIHMS710055-supplement-Tables.pdf]

Supplementary Table 1. Optimization parameters for 5-azacytidine and 5-methyl-2'-deoxycytidine

|                           | Declustering potential (V) | Entrance potential (V) | Collision energy (eV) | Collision cell exit potential (V) |
|---------------------------|----------------------------|------------------------|-----------------------|-----------------------------------|
| 5-Azacytidine             | 106                        | 10                     | 31                    | 14                                |
| 5-methyl-2'-deoxycytidine | 86                         | 10                     | 31                    | 8                                 |

Supplementary Table 2. Validation characteristics of 5-azacytidine

|                                         | LLOQ (5 ng/mL) | Low (15 ng/mL) | Medium (150 ng/mL) | High (400 ng/mL) | AULQ (4,000 ng/mL) | 1mg/mL in 50% Methanol |
|-----------------------------------------|----------------|----------------|--------------------|------------------|--------------------|------------------------|
| n                                       | 15             | 15             | 15                 | 15               | 15                 |                        |
| Average                                 | 5.45           | 14.67          | 157                | 414              | 4075               |                        |
| Standard Deviation                      | 0.52           | 1.08           | 11.01              | 28.42            | 321.16             |                        |
| Accuracy (%)                            | 109.1          | 97.8           | 104.4              | 103.4            | 101.9              |                        |
| Within-day Precision (%)                | 9.8            | 5.1            | 5.5                | 5.4              | 6.4                |                        |
| Between-day Precision (%)               | **             | 6.4            | 5.2                | 5                | 5.5                |                        |
| Stock Stability (-2°C) (46 Days) (%)    |                |                |                    |                  |                    | 92.4                   |
| Plasma Stability (-70°C) (166 Days) (%) |                | 91.5           |                    | 100.9            | 96.7               |                        |
| Plasma Stability (-70°C) (323 Days) (%) |                | 85.7           |                    | 89.5             | 91.0               |                        |

\*\* No additional information was observed as a result of performing the assay in different runs.

Supplementary Table 3. Matrix Effects and Recovery of 5-azacytidine (n=3)

| Sample Name        | Previous Published Assay <sup>1</sup> |                       |                           |                           | Current Assay       |                       |                           |                           |
|--------------------|---------------------------------------|-----------------------|---------------------------|---------------------------|---------------------|-----------------------|---------------------------|---------------------------|
|                    | Average Area Counts                   | Analyte Matrix Effect | Analyte Absolute Recovery | Analyte Combined Recovery | Average Area Counts | Analyte Matrix Effect | Analyte Absolute Recovery | Analyte Combined Recovery |
| QC Low Neat        | 2.06E+06                              |                       |                           |                           | 2.06E+06            |                       |                           |                           |
| QC Low Post Spike  | 1.46E+06                              | -29%                  | 5%                        | 4%                        | 1.01E+06            | -51%                  | 35%                       | 17%                       |
| QC Low Pre Spike   | 7.32E+04                              |                       |                           |                           | 3.57E+05            |                       |                           |                           |
| QC Mid Neat        | 2.21E+07                              |                       |                           |                           | 2.05E+07            |                       |                           |                           |
| QC Mid Post Spike  | 1.48E+07                              | -33%                  | 2%                        | 1%                        | 9.28E+06            | -55%                  | 36%                       | 16%                       |
| QC Mid Pre Spike   | 2.37E+05                              |                       |                           |                           | 3.37E+06            |                       |                           |                           |
| QC High Neat       | 5.75E+07                              |                       |                           |                           | 5.82E+07            |                       |                           |                           |
| QC High Post Spike | 3.72E+07                              | -35%                  | 4%                        | 3%                        | 2.66E+07            | -54%                  | 34%                       | 15%                       |
| QC High Pre Spike  | 1.58E+06                              |                       |                           |                           | 8.98E+06            |                       |                           |                           |
